# Supplementary material for: Evaluation of Outcomes Following Hospital-Wide Implementation of a Subcutaneous Insulin Protocol for Diabetic Ketoacidosis
Source: PubMed Central journal article supplement (PMC8990349; doi:10.1001/jamanetworkopen.2022.6417), 2022-04-07
Supplement: jamanetwopen-e226417-s001.pdf [file jamanetwopen-e226417-s001.pdf]

## Supplemental Online Content

Rao P, Jiang SF, Kipnis P, et al. Evaluation of outcomes following hospital-wide implementation of a subcutaneous insulin protocol for diabetic ketoacidosis. *JAMA Netw Open*. 2022;5(4):e226417. doi:10.1001/jamanetworkopen.2022.6417

### **eTable.** Missingness of Laboratory Values Data in Diabetic Ketoacidosis Cohort

This supplemental material has been provided by the authors to give readers additional information about their work.

**eTable. Missingness of Laboratory Values Data in Diabetic Ketoacidosis Cohort**

|                            | Intervention Site |                | Standard Care Site |                  |
|----------------------------|-------------------|----------------|--------------------|------------------|
|                            | Pre               | Post           | Pre                | Post             |
| <i>Hospital encounters</i> | <i>n = 298</i>    | <i>n = 122</i> | <i>n = 4,441</i>   | <i>n = 3,128</i> |
| <i>Unique patients</i>     | <i>n = 173</i>    | <i>n = 87</i>  | <i>n = 2,703</i>   | <i>n = 2,083</i> |
| Glucose                    | 0(0.0)            | 0(0.0)         | 0(0.0)             | 0(0.0)           |
| Anion gap                  | 0(0.0)            | 0(0.0)         | 1(0.02)            | 0(0.0)           |
| Blood urea nitrogen        | 0(0.0)            | 0(0.0)         | 2(0.05)            | 0(0.0)           |
| Bicarbonate                | 0(0.0)            | 0(0.0)         | 2(0.05)            | 0(0.0)           |
| Sodium                     | 0(0.0)            | 0(0.0)         | 0(0.0)             | 0(0.0)           |
| White blood cell count     | 0(0.0)            | 0(0.0)         | 9(0.2)             | 1(0.03)          |
| Creatinine                 | 0(0.0)            | 0(0.0)         | 0(0.0)             | 0(0.0)           |
| Potassium                  | 1(0.3)            | 0(0.0)         | 175(3.9)           | 95(3.0)          |
| Chloride                   | 0(0.0)            | 0(0.0)         | 6(0.1)             | 6(0.2)           |
| Arterial PH                | 130(43.6)         | 96(78.6)       | 1854(41.7)         | 2376(76.0)       |
| Venous PH                  | 194(65.1)         | 53(43.4)       | 2778(62.6)         | 1132(36.2)       |
